# Supplementary material
Source: PubMed Central journal article supplement (PMC4624161)
Supplement: mmc1.pdf [file mmc1.pdf]

**Biophysical Journal**

**Supporting Material**

**Characterizing Cellular Biophysical Responses to Stress by Relating Density, Deformability, and Size**

Sangwon Byun,<sup>1,2</sup> Vivian C. Hecht,<sup>1</sup> and Scott R. Manalis<sup>1,2,3,\*</sup>

<sup>1</sup>Department of Biological Engineering, <sup>2</sup>Koch Institute for Integrative Cancer Research, and <sup>3</sup>Department of Mechanical Engineering, Massachusetts Institute of Technology, Cambridge, Massachusetts

## Supporting Material

### Estimating the error contribution from converting buoyant mass to volume with an average cell density using a Monte Carlo simulation

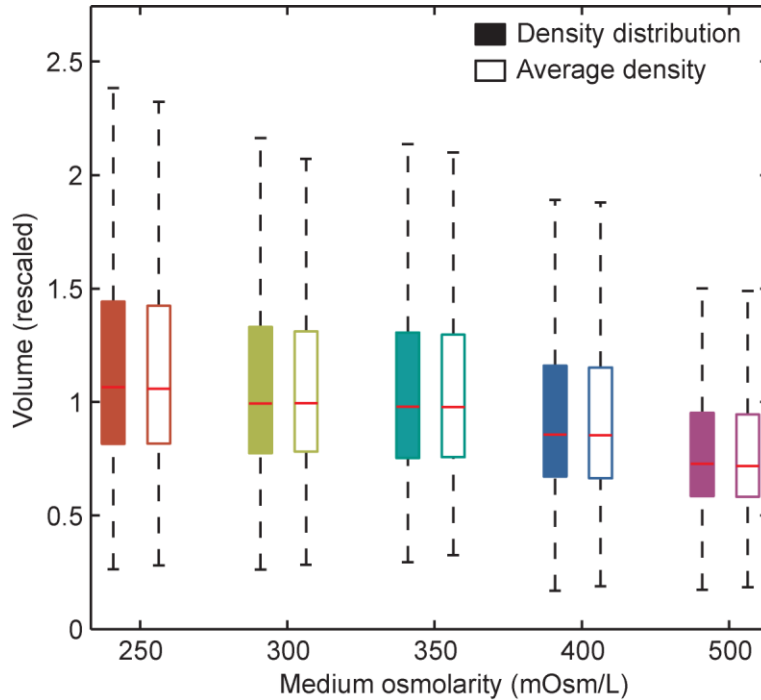

Fig. S1. Converting the buoyant mass from the constriction SMR to a volume using a density distribution (solid color) or average density (outline) value does not significantly increase the width of the subsequent volume distribution. A Monte Carlo simulation ( $n = 10000$ ) was used to calculate a volume distribution (solid color) based on independent, random sampling of values from buoyant mass and density distributions. This distribution was compared to a distribution calculated by converting a buoyant mass distribution to a volume distribution using an average density value (outline). Red lines represent the median for each value, the top and bottom box boundaries represent the 75<sup>th</sup> and 25<sup>th</sup> percentile of the data, respectively, and the whiskers represent the most extreme data points not considered outliers. Representative data is from measurements at 250, 300, 350, 400, and 500 mOsm/L.

### Estimating changes to water content

To determine the changes to water content following osmotic stress, we employed the model described below (1). We start by describing the total mass of the cell ( $m_{tot}$ ) as composed of aqueous ( $m_{water}$ ) and dry ( $m_{dry}$ ) material:

$$m_{tot} = m_{water} + m_{dry} \quad (1)$$

We can rewrite this equation in terms of density and volume, based on the general relationship between mass, density and volume described in equation (2):

$$m = \rho V \quad (2)$$

$$\rho_{tot} V_{tot} = \rho_{water} V_{water} + \rho_{dry} V_{dry} \quad (3)$$

where  $\rho_{tot}$ ,  $\rho_{water}$  and  $\rho_{dry}$  refer to the density of the total cellular, aqueous and dry material, respectively, and  $V_{tot}$ ,  $V_{water}$  and  $V_{dry}$  refer to the volume of the total, aqueous and dry material. We can also describe the volume of the cell in a manner similar to equation (1):

$$V_{tot} = V_{water} + V_{dry} \quad (4)$$

By combining equations (3) and (4), and assuming a water density of 1 g/mL, we can obtain expressions for the amounts of aqueous and dry material, described in terms of volume:

$$V_{dry} = V_{tot} \left( \frac{\rho_{tot} - 1}{\rho_{dry} - 1} \right) \quad (5)$$

$$V_{water} = V_{tot} \left( 1 - \left( \frac{\rho_{tot} - 1}{\rho_{dry} - 1} \right) \right) \quad (6)$$

Table S1. Biological effects and mechanisms of drugs used in Fig. 5.

| Drug          | Biological effects and mechanisms                                                                                                                         |
|---------------|-----------------------------------------------------------------------------------------------------------------------------------------------------------|
| Latrunculin B | <i>Inhibition of actin polymerization</i> : deformability decrease, apoptosis (2), cell cycle arrest (3), protein synthesis inhibition (4)                |
| Staurosporine | <i>Inhibition of protein kinases</i> : apoptosis, deformability change (5), cell cycle arrest (6), protein synthesis inhibition (7)                       |
| Torin 1       | <i>Inhibition of mTOR</i> : cell cycle arrest, modification of actin polymerization (8, 9), apoptosis (10) , protein synthesis inhibition (11)            |
| Rapamycin     |                                                                                                                                                           |
| Cycloheximide | <i>Inhibition of translocation</i> : protein synthesis inhibition, deformability change (12), apoptosis (13), cytoprotection (14), cell cycle arrest (15) |

## Supporting References

1. Feijó Delgado, F., N. Cermak, V.C. Hecht, S. Son, Y. Li, S.M. Knudsen, S. Olcum, J.M. Higgins, J. Chen, W.H. Grover, and S.R. Manalis. 2013. Intracellular water exchange for measuring the dry mass, water mass and changes in chemical composition of living cells. *PLoS One*. 8: e67590.
2. Xu, J., M. Millard, X. Ren, O.T. Cox, and A. Erdreich-Epstein. 2010. c-Abl mediates endothelial apoptosis induced by inhibition of integrins  $\alpha 3$  and  $\alpha 5$  and by disruption of actin. *Blood*. 115: 2709–2718.
3. Huang, S., C.S. Chen, and D.E. Ingber. 1998. Control of cyclin D1, p27(Kip1), and cell cycle progression in human capillary endothelial cells by cell shape and cytoskeletal tension. *Mol. Biol. Cell*. 9: 3179–3193.
4. Stapulionis, R., S. Kolli, and M.P. Deutscher. 1997. Efficient mammalian protein synthesis requires an intact F-actin system. *J. Biol. Chem*. 272: 24980–24986.
5. Pelling, A.E., F.S. Veraitch, C.P.-K. Chu, C. Mason, and M.A. Horton. 2009. Mechanical dynamics of single cells during early apoptosis. *Cell Motil. Cytoskeleton*. 66: 409–422.
6. Bruno, S., B. Ardel, J.S. Skierski, F. Traganos, and Z. Darzynkiewicz. 1992. Different effects of staurosporine, an inhibitor of protein kinases, on the cell cycle and chromatin structure of normal and leukemic lymphocytes. *Cancer Res*. 52: 470–473.
7. Tee, A.R., and C.G. Proud. 2001. Staurosporine inhibits phosphorylation of translational regulators linked to mTOR. *Cell Death Differ*. 8: 841–849.
8. Castellano, F., C.L. Clainche, D. Patin, M.F. Carlier, and P. Chavrier. 2001. A WASp-VASP complex regulates actin polymerization at the plasma membrane. *EMBO J*. 20: 5603–5614.
9. Kuehn, H.S., M.Y. Jung, M.A. Beaven, D.D. Metcalfe, and A.M. Gilfillan. 2011. Prostaglandin E2 activates and utilizes mTORC2 as a central signaling locus for the regulation of mast cell chemotaxis and mediator release. *J. Biol. Chem*. 286: 391–402.
10. Sun, S.-Y. 2013. mTOR kinase inhibitors as potential cancer therapeutic drugs. *Cancer Lett*. 340: 1–8.
11. Thoreen, C.C., S.A. Kang, J.W. Chang, Q. Liu, J. Zhang, Y. Gao, L.J. Reichling, T. Sim, D.M. Sabatini, and N.S. Gray. 2009. An ATP-competitive mammalian target of rapamycin inhibitor reveals rapamycin-resistant functions of mTORC1. *J. Biol. Chem*. 284: 8023–8032.

12. Laporte, J.D., P.E. Moore, R.A. Panettieri, W. Moeller, J. Heyder, S.A. Shore, D. Johanne, and A. Reynold. 1998. Prostanoids mediate IL-1-beta-induced beta-adrenergic hyporesponsiveness in human airway smooth muscle cells. *Am J Physiol.* 275: 491–501.
13. Tang, D., J.M. Lahti, J. Grenet, and V.J. Kidd. 1999. Cycloheximide-induced T-cell death is mediated by a Fas-associated death domain-dependent mechanism. *J. Biol. Chem.* 274: 7245–52.
14. Mattson, M.P., and K. Furukawa. 1997. Anti-apoptotic actions of cycloheximide : blockade of programmed cell death or induction of programmed cell life ? *Apoptosis.* 2: 257–264.
15. Liu, X., J.-M. Yang, S.S. Zhang, X.-Y. Liu, and D.X. Liu. 2010. Induction of cell cycle arrest at G1 and S phases and cAMP-dependent differentiation in C6 glioma by low concentration of cycloheximide. *BMC Cancer.* 10: 684.
